1 Title: Host immune responses after suprachoroidal delivery of AAV8 in nonhuman primate eyes.

2

3 Authors; Sook Hyun Chung<sup>1</sup>, Iris Natalie Mollhoff<sup>1</sup>, Alaknanda Mishra<sup>2</sup>, Tzu-Ni Sin<sup>1</sup>, Taylor Ngo<sup>1</sup>,  
4 Thomas Ciulla<sup>3</sup>, Paul Sieving<sup>1</sup>, Sara M. Thomasy<sup>1,4</sup>, and Glenn Yiu<sup>1</sup>.

5

6 1. Department of Ophthalmology & Vision Science, University of California Davis, Davis, CA,  
7 U.S.A.

8 2. Department of Cell Biology & Human Anatomy, University of California Davis, Davis, CA,  
9 U.S.A.

10 3. Clearside Biomedical Inc, Alpharetta, GA, U.S.A

11 4. Department of Surgical and Radiological Sciences, School of Veterinary Medicine, University  
12 of California Davis, Davis, CA, U.S.A.

13

14 Correspondence should be addressed to G.Y ([gyiu@ucdavis.edu](mailto:gyiu@ucdavis.edu)).

15

16 Corresponding author

17 Glenn Yiu, M.D., PhD.

18 Department of Ophthalmology & Vision Science

19 University of California Davis

20 Email: [gyiu@ucdavis.edu](mailto:gyiu@ucdavis.edu)

21 Phone: +1 (916) 734-6602

22 Address: 4860 Y St., Suite 2400 Sacramento, CA, 95817

23

24 Short title: Immune response after intraocular AAV8 delivery

25

26 **Abstract (200 words)**

27           The suprachoroid is a potential space located between the sclera and choroid of the eye  
28 which provides a novel route for ocular drug or viral vector delivery. Suprachoroidal injection of  
29 AAV8 using transscleral microneedles enables widespread transgene expression in eyes of  
30 nonhuman primates, but may cause intraocular inflammation. We characterized the host humoral  
31 and cellular immune responses after suprachoroidal delivery of AAV8 expressing green  
32 fluorescent protein (GFP) in rhesus macaques, and found that it can induce a mild chorioretinitis  
33 that resolves after systemic corticosteroid administration, with recovery of photoreceptor  
34 morphology but persistent immune cell infiltration after 3 months. Suprachoroidal AAV8 triggered  
35 B-cell and T-cell responses against GFP, but only mild antibody responses to the viral capsid as  
36 compared to intravitreal injections of the same vector and dose. Systemic biodistribution studies  
37 showed lower AAV8 levels in liver and spleen after suprachoroidal injection compared with  
38 intravitreal delivery. Our findings suggest that suprachoroidal AAV8 primarily triggers host  
39 immune responses to GFP, likely due to sustained transgene expression in scleral fibroblasts  
40 outside the blood-retinal barrier, but elicits less humoral immune reactivity to the viral capsid than  
41 intravitreal delivery due to lower egress into systemic circulation. Thus, suprachoroidal AAV  
42 delivery of human transgenes may have significant translational potential for retinal gene therapy.

43

## 44 **Introduction**

45           The first approved ocular gene therapy for treating biallelic RPE65 mutation-associated  
46 retinal dystrophy, Leber's Congenital Amaurosis, has generated much enthusiasm for the use of  
47 adeno-associated viruses (AAVs) as vectors for retinal gene delivery.<sup>1-6</sup> Recombinant AAVs are  
48 highly effective vectors for gene delivery due to their ability to transduce a wide variety of retinal  
49 cell types and relative safety given their nonpathogenic and non-integrating nature.<sup>7</sup> However,  
50 although AAV vectors are much less immunogenic than adenoviruses, host immune responses  
51 triggered by the viral vector or transgene product can limit the effectiveness of the treatment.<sup>8,9</sup>  
52 Humoral immune responses from neutralizing antibodies (NAbs) produced by B-cells can inhibit  
53 vector transduction. These antibodies may arise from prior exposure to wild-type AAV causing  
54 pre-existing immunity, or be triggered by therapeutic vector administration which prevents or  
55 suppresses further transduction.<sup>10-13</sup> Also, cell-mediated immune responses from cytokine-  
56 secreting T-cells can directly destroy transduced cells.<sup>14</sup> Together, host humoral and cellular  
57 immune responses contribute to eliminating vectors and transduced cells, thus limiting the  
58 therapeutic effect.

59           Although the eye has been considered to be an immunologically-protected space,<sup>15</sup> the  
60 immunogenicity of AAV-mediated gene transfer in the eye varies with the route of administration.  
61 Subretinal injections, which entail a needle puncture through the neurosensory retina, enables  
62 efficient transduction of multiple cell types including photoreceptors and the underlying retinal  
63 pigment epithelium (RPE), and triggers minimal humoral immune responses.<sup>16,17</sup> However, the  
64 procedure requires complex vitrectomy surgery and the therapeutic effect is limited to the area of  
65 the injected fluid bleb. Intravitreal injections can be easily performed in an outpatient clinical  
66 setting, and newer generations of AAV can overcome the internal limiting membrane (ILM)

67 barrier to transduce deeper retinal layers.<sup>18,19</sup> But unlike subretinal injections, intravitreal delivery  
68 triggers more pronounced humoral and cellular responses against the AAV capsid, occasionally to  
69 levels matching systemic administration.<sup>13,20</sup>

70 We and others have recently described a novel mode of ocular gene delivery by injecting  
71 AAV into the suprachoroidal space, which is located between the scleral wall and the choroidal  
72 vasculature of the eye.<sup>21,22</sup> Although this potential space is barely detectable under physiologic  
73 conditions,<sup>23,24</sup> suprachoroidal injection of compounds using transscleral microneedles expands  
74 the suprachoroidal space as seen on *in vivo* imaging,<sup>25,26</sup> enabling targeted drug delivery to retinal  
75 and choroidal tissues while minimizing adverse effects on anterior segment structures.<sup>27-31</sup>  
76 Suprachoroidal injection of a triamcinolone acetonide suspension using these microneedles has  
77 been effective in treating macular edema from noninfectious uveitis in human clinical trials.<sup>32</sup>

78 Using nonhuman primates (NHPs), we found that suprachoroidal injection of AAV8 using  
79 transscleral microneedles enables widespread, peripheral transduction of mostly RPE cells. By  
80 contrast, subretinal injection of AAV8 transduced outer retinal cells including photoreceptors and  
81 RPEs, but was limited to the injection site.<sup>21</sup> Since the suprachoroidal space is located outside the  
82 blood-retinal barrier, we also investigated the inflammatory response in retinal and choroidal  
83 tissues, and found a greater degree of local immune cell infiltration after suprachoroidal delivery  
84 of AAV8 compared with subretinal or intravitreal injections. Interestingly, we found that  
85 intravitreal AAV8 triggered more serum NABs than the other modes of injection, likely due to  
86 differences in the pharmacokinetics and biodistribution of the different modes of ocular AAV  
87 delivery.

88 In this ancillary study, we explore in detail the host humoral and cellular immune responses  
89 to suprachoroidal AAV8 in these rhesus macaques. Like humans, NHPs are natural hosts for wild-

90 type AAV and develop immune conversions to subclinical infection, making them an excellent  
91 animal model for predicting host immune responses to AAV vectors in humans. We found that  
92 suprachoroidal injection of AAV8 expressing green fluorescent protein (GFP) can elicit a transient  
93 chorioretinitis that clinically resolves after systemic corticosteroid administration, with recovery  
94 of photoreceptor morphology despite some persistence of immune cell infiltration over 3 months.  
95 Suprachoroidal injections trigger both B-cell and T-cell responses against the GFP transgene  
96 product, whereas the response against AAV8 capsid was minimal compared with intravitreal  
97 injections. Systemic biodistribution assays showed limited presence of the AAV8 in the liver and  
98 spleen after suprachoroidal injections as compared with intravitreal delivery. As suprachoroidal  
99 injection of AAV is currently under evaluation for retinal gene therapy in human clinical trials,  
100 our results provide an important, clinically-relevant, and unique exploration of host immune  
101 responses from viral gene delivery to different ocular compartments surrounding the blood-retinal  
102 barrier.

## 103 **Results**

### 104 Study design and clinical course

105 Experiments to evaluate the transduction efficacy, pattern, durability, and cell-type  
106 specificity of suprachoroidal AAV8 injections in rhesus macaques using transscleral microneedles  
107 have been previously described.<sup>21</sup> Briefly, we identified 5 animals between age 4-10 years with no  
108 pre-existing NAbs against AAV8, and injected both eyes with NHP-grade AAV8 that expresses  
109 enhanced GFP under a cytomegalovirus (CMV) promoter at  $7 \times 10^{11}$  vg/eye (low dose) or  $7 \times 10^{12}$   
110 vg/eye (high dose), using either a 700- $\mu$ m long 30-gauge microneedle (Clearside Biomedical,  
111 Alpharetta, GA, USA) for suprachoroidal or transscleral subretinal injection, or a 0.5-inch-long  
112 30-gauge conventional needle for intravitreal injection (Supplementary Table 1). Of these, two

113 animals received suprachoroidal AAV8 in both eyes (Rhesus 01 with  $7 \times 10^{11}$  vg/eye and Rhesus  
114 02 with  $7 \times 10^{12}$  vg/eye), two animals (Rhesus 03 and 04) received suprachoroidal injection of  
115 AAV8 in one eye ( $7 \times 10^{12}$  vg/eye) and subretinal delivery of AAV8 in the contralateral eye ( $7 \times$   
116  $10^{12}$  vg/eye), and the last animal (Rhesus 05) received intravitreal injection of AAV8 in both eyes  
117 ( $7 \times 10^{12}$  vg/eye). After 1 month, suprachoroidal delivery of high-dose AAV8 produced diffuse,  
118 peripheral, and circumferential GFP fluorescence with a punctate pattern of expression (Figure  
119 1A). By comparison, subretinal AAV8 resulted in a focal area of intense GFP expression (Figure  
120 1B), while intravitreal AAV8 only produced a small peripapillary area of faint expression at the  
121 same high dose (Figure 1C). Suprachoroidal delivery of low-dose AAV8 ( $7 \times 10^{11}$  vg/eye) did not  
122 produce any detectable transgene expression on fundus fluorescence imaging.

123         Although most of the animals did not exhibit significant anterior chamber (AC) or vitreous  
124 inflammation throughout the study, Rhesus 02 developed mild 2+ AC cell based on  
125 Standardization of Uveitis Nomenclature (SUN) criteria at 2 weeks requiring treatment with oral  
126 prednisone (1 mg/kg) for 2 weeks with subsequent resolution of the AC cell by month 1. At 1  
127 month, this animal also demonstrated a peripheral chorioretinitis with small, punctate spots (Figure  
128 1D), some perivascular sheathing (Figure 1E), and radial retinal striae in the macular region  
129 without significant macular edema (Figure 1F), which all appear resolved by month 3 (Figures 1G-  
130 1I). Spectral domain-optical coherence tomography (SD-OCT) imaging showed fine,  
131 hyperreflective foci in the vitreous and retinal surface at 1 month (Figure 1J) indicating subclinical  
132 vitritis not readily seen on funduscopic examination, which also resolved after 3 months (Figure  
133 1K). We did not note significant vitreous cell in the peripheral regions of the transduced retina in  
134 Rhesus 02, or in any other animals after suprachoroidal delivery of AAV (Figure 1L). Eyes that  
135 received subretinal AAV8 showed localized vascular dilation and perivascular hyperreflective foci

136 in the vitreous in the most intense regions of GFP expression (Figure 1M and 1O), indicating  
137 localized vasculitis and subclinical vitritis in these animals. Eyes that received intravitreal injection  
138 of AAV8 showed no detectable vitritis, chorioretinitis, or vasculitis, even in the small peripapillary  
139 region of transduction (Figures 1N and 1P). Thus, suprachoroidal injection of AAV8 may trigger  
140 an anterior uveitis, peripheral chorioretinitis, and mild vitritis that all resolve with oral  
141 corticosteroid treatment over 2 weeks. Subretinal AAV8 can also trigger mild, localized vasculitis  
142 and vitritis in the area of transduction, while intravitreal AAV8 exhibit poor transduction but  
143 showed no detectable intraocular inflammation.

#### 144 Local inflammatory responses after suprachoroidal AAV8

145 We previously found that suprachoroidal AAV8 injection elicited greater local infiltration  
146 of inflammatory cells than transscleral subretinal or intravitreal injections at 1 month post-  
147 injection.<sup>21</sup> In this study, we further characterize the local inflammation using  
148 immunohistochemistry at 2 and 3 months after suprachoroidal AAV8 delivery (Figure 2). GFP  
149 transgene expression was detectable in both RPE and scleral tissues at 1 month, but only persisted  
150 in the sclera at months 2 and 3, appearing mostly in spindle-shaped cells that resemble scleral  
151 fibroblasts. The GFP expression in the sclera was not visible on live fundus imaging likely due to  
152 blockage of the fluorescence by the darkly-pigmented RPE and uvea in rhesus macaques.<sup>33</sup> Local  
153 infiltration of ionized calcium-binding adaptor-1 (Iba1)+ microglia and macrophages (Figures 2A-  
154 2E), CD45+ leukocytes (Figures 2F-2J), CD8+ cytotoxic T cells (Figures 2K-2O), as well as  
155 reactive gliosis as shown by glial fibrillary acidic protein (GFAP) staining (Figures 2P-2T), were  
156 detected through month 3 as compared to uninjected control animals. Interestingly, the outer retinal  
157 layers and RPE architecture appeared partly restored at month 3 in the animal that received  
158 systemic corticosteroids (Figures 2U-2Y). The animal that received low-dose suprachoroidal



159 AAV8 injections also demonstrated GFP expression in the sclera, and exhibited a similar degree  
160 of local inflammatory responses at month 3 (Figures 2D, 2I, 2N, 2S, 2X).

161 *Humoral immune responses after suprachoroidal AAV8*

162 To evaluate humoral immune response from B-cells, we employed a sandwich enzyme-  
163 linked immunosorbent assay (ELISA) to measure serum binding antibodies against the AAV8  
164 capsid or GFP transgene product after suprachoroidal or intravitreal delivery of the AAV8 vector  
165 (Figures 3A and 3B). Most of the animals that received suprachoroidal AAV8 developed minimal  
166 antibody responses against the viral capsid, whereas the animal that received intravitreal AAV8  
167 exhibited higher anti-AAV8 antibody levels within 1 month (Figure 3A). These results are  
168 consistent with our prior study which demonstrated higher concentrations of serum NAb from  
169 intravitreal than suprachoroidal or subretinal AAV8 as measured using an *in vitro* transduction  
170 inhibition assay.<sup>21</sup> By contrast, only animals that received suprachoroidal AAV8 developed anti-  
171 GFP antibodies, which reached the highest levels at month 3, while the animal that received only  
172 intravitreal AAV8 did not (Figure 3B). As Rhesus 02 received high-dose suprachoroidal AAV8 in  
173 both eyes, we further validated the humoral response to GFP by performing flow cytometry on  
174 peripheral blood mononuclear cells (PBMCs) collected from the serum of this animal, and found  
175 expansion of GFP-responsive plasma B-cells (CD19<sup>-</sup>, CD27<sup>+</sup>, CD38<sup>+</sup>, HLADR<sup>low</sup>) after  
176 suprachoroidal AAV8 injection (Figure 3C, Supplementary Figure 1) which likely accounts for  
177 the greater production of systemic anti-GFP antibodies. Interestingly, the animal that received  
178 low-dose AAV8 (Rhesus 01) developed similar concentrations of anti-GFP antibodies (Figure 3B).  
179 Together, these findings suggest that although intravitreal AAV8 produces an earlier and more  
180 robust humoral response to the viral capsid, suprachoroidal delivery triggers greater antibody

181 responses to GFP, possibly due to exposure of GFP-expressing scleral fibroblasts to systemic  
182 immune surveillance, given their location outside the blood-retinal barrier.

### 183 *Cell-mediated immune responses after suprachoroidal AAV8*

184 We next explored cell-mediated immune responses to suprachoroidal AAV8 using  
185 ELISpot assays to detect interferon- $\gamma$  (IFN- $\gamma$ )-producing T-cells against AAV8 or GFP in PBMCs  
186 collected throughout the study and in splenocytes collected at time of necropsy (Figure 4). None  
187 of the animals showed appreciable T-cell responses to the AAV8 capsid with the exception of  
188 Rhesus 01 which appeared to have pre-existing T-cell responses to AAV8 prior to injection (Figure  
189 4A), despite not having anti-AAV8 antibodies (Figure 3A) or NAbS at baseline.<sup>21</sup> Similar to the  
190 humoral immune responses, suprachoroidal AAV8 also triggered T-cell responses to GFP  
191 beginning as early as 1 month after injection, particularly in animals that received suprachoroidal  
192 injections in both eyes (Figure 4B). Using splenocytes collected at necropsies, we found  
193 suprachoroidal AAV8 injection triggered greater T-cell responses to the GFP transgene product  
194 than to the viral vector (Figures 4C-4D, Supplementary Figure 2).

### 195 *Systemic biodistribution of suprachoroidal AAV8*

196 To evaluate systemic biodistribution after suprachoroidal AAV8 delivery, we performed  
197 quantitative PCR to detect the GFP transgene sequence in genomic DNA from peripheral organs  
198 including kidney, liver, and spleen. The highest genome copies were detected in the spleen,  
199 followed by the liver, and was undetectable in the kidney (Figure 5). Interestingly, the animal that  
200 received intravitreal injection of AAV8 in both eyes (Rhesus 05) showed much higher genome  
201 copies of the vector in the spleen and liver, as compared to animals that received suprachoroidal  
202 AAV8 in both eyes (Rhesus 01 and 02) or suprachoroidal and subretinal AAV8 in fellow eyes

203 (Rhesus 03 and 04). These studies suggest that suprachoroidal AAV delivery may result in some  
204 systemic distribution to peripheral organs such as the spleen and liver, but at much lower amounts  
205 than intravitreal injections.

## 206 **Discussion**

207         Despite the presence of ocular immune privilege, AAV-mediated gene delivery to the eye  
208 triggers host immune responses that may vary with AAV dose, serotype, route of delivery, and  
209 type of transgene. Early studies from the RPE65 gene therapy trials using an AAV2 vector reported  
210 a dose-dependent immune response with intraocular inflammation observed in the high-dose ( $1 \times$   
211  $10^{12}$  vg/eye), but not low-dose ( $1 \times 10^{11}$  vg/eye) patient cohorts.<sup>1</sup> The presence of pre-existing  
212 immunity also varies with AAV serotypes, as seroprevalence of anti-AAV2 NAbs in humans has  
213 been reported to range between 30-60%, while NAbs against AAV7, AAV8, and AAV9 are lower  
214 at 15-30%.<sup>34,35</sup> Importantly, the route of vector delivery is a major determinant of host immune  
215 responses. Intravitreal injections of AAV2 and AAV8 triggers more intraocular inflammation, with  
216 more robust humoral and cellular immune responses in mice and NHPs than subretinal  
217 delivery,<sup>13,16,36-38</sup> presumably due to the greater egress of viral particles into systemic circulation  
218 from the vitreous cavity. In this study, we evaluated host immune responses to a novel mode of  
219 delivering viral vectors into the suprachoroidal space of NHPs using transscleral microneedles.<sup>21,22</sup>  
220 Using an AAV8 vector to express GFP under a CMV promoter, we found that suprachoroidal  
221 delivery can trigger a peripheral chorioretinitis and vitritis with outer retinal disruption at month 1  
222 after viral injection, but subsequently showed resolution of inflammation and restoration of retinal  
223 architecture at month 3, after systemic corticosteroid administration. The inflammation was  
224 accompanied by both humoral and cell-mediated responses to the GFP transgene product, but a  
225 less pronounced humoral response to the AAV8 capsid than intravitreal injections.

226           The host immune responses to the GFP transgene and viral vector can be explained by the  
227 pattern of transgene expression, systemic biodistribution of the viral vectors, and unique location  
228 of the suprachoroidal space outside the blood-retinal barrier. The blood-retinal barrier is composed  
229 of an inner barrier that consists of retinal capillary endothelium, and an outer barrier formed by  
230 RPE tight junctions. While the vitreous cavity and subretinal space are immune-privileged ocular  
231 compartments within this barrier, the suprachoroidal space is adjacent to the highly-fenestrated  
232 choroidal vasculature and readily interfaces with macrophages in the choroid and sclera outside of  
233 this barrier. In contrast to intravitreal and subretinal injections which enabled focal GFP  
234 transduction within the neurosensory retina, suprachoroidal AAV8 produced broad regions of  
235 transgene expression in the RPE and sclera which are outside the blood-retinal barrier. RPE are  
236 potent antigen presenting cells (APCs) of the retina,<sup>39,40</sup> while macrophages and dendritic cells are  
237 prevalent in the sclera.<sup>41</sup> In our study, we observed Iba1+ macrophages/microglia surrounding  
238 GFP-expressing RPE, but did not clearly detect any GFP-expressing Iba1+ cells. While the exact  
239 cell type responsible for antigen presentation is unclear, our results suggest that immune  
240 sensitization likely occurs locally in the eye rather than in peripheral tissues, as both humoral and  
241 cellular immune responses to GFP appeared to correlate with the greater transgene expression in  
242 the sclera after suprachoroidal injections, regardless of AAV dose, rather than to the higher  
243 amounts of viral genomes in peripheral organs after intravitreal delivery. This hypothesis and our  
244 results are consistent with the study by Vanderberghe et al, in which T-cell responses against GFP  
245 but not AAV capsid were found in NHP eyes after subretinal AAV8 delivery.

246           Even though the suprachoroidal space is outside the blood-retinal barrier, intravitreal  
247 AAV8 triggered a more robust humoral response to the viral capsid, likely due to greater systemic  
248 exposure to the AAV8 vector as shown in our biodistribution studies. Trabecular outflow through

249 the canal of Schlemm accounts for 80-90% of vitreous and aqueous humor drainage from the eye,  
250 while uveoscleral outflow which likely mediates AAV egress from the suprachoroidal space is less  
251 efficient.<sup>42</sup> Our findings are consistent with previous studies demonstrating greater humoral  
252 immune responses after intravitreal versus subretinal injections,<sup>36,37,43</sup> and suggest that the  
253 suprachoroidal space may have better retention of viral particles than the vitreous cavity.

254 Although the current study focused on AAV8-binding antibodies, we previously found a  
255 similar pattern of NAb response that was also more pronounced after intravitreal than  
256 suprachoroidal AAV delivery. NAbs prevent viral particles from phagocytosis by blocking  
257 essential receptor interactions between the virus and host cells, and may also sequester AAV  
258 distribution to the spleen.<sup>44</sup> By contrast, the role of non-neutralizing antibodies is unclear, and may  
259 enhance the clearance of AAV vectors through opsonization or have the opposite effects of  
260 NAbs.<sup>44,45</sup> Interestingly, although serum NAbs can impact the re-administration of AAV given  
261 intravitreally,<sup>43</sup> they do not appear to affect the functional effectiveness of AAV readministered  
262 subretinally.<sup>46</sup> Because a major advantage of suprachoroidal AAV delivery is the capacity for  
263 repeated injections, future studies are necessary to determine if the effectiveness of suprachoroidal  
264 AAV re-administration may be impacted on repeated dosing.

265 Our biodistribution assays demonstrated greater peripheral distribution of viral genomes to  
266 the spleen and liver after intravitreal injections, compared with suprachoroidal AAV8 delivery,  
267 similar to findings by Seitz and colleagues who also found more viral genomes in peripheral organs  
268 after intravitreal versus subretinal AAV8 in NHPs.<sup>47</sup> The higher expression in the spleen alludes  
269 to a deviant immune response similar to anterior chamber associated immune deviation (ACAID)  
270 – a phenomenon in which immunogen bearing APCs from the eye migrate through the trabecular  
271 meshwork to the spleen, where afferent CD4+ Th1 cells and efferent CD8+ cytotoxic T cells

272 differentiate and mature.<sup>15</sup> Further studies to distinguish more pro-inflammatory from  
273 immunosuppressive T-cell subtypes could elucidate the nature of the host cellular immune  
274 responses, and help refine strategies for mitigation. The timing of T-cell-directed  
275 immunosuppression, for example, has been shown to impact transgene immunogenicity after  
276 subretinal AAV delivery.

277         There are several limitations to our study. Like humans, rhesus macaques are native hosts  
278 of AAVs without significant disease association,<sup>48,49</sup> but exhibit higher seroprevalence of pre-  
279 existing immunity to AAV8 capsids.<sup>50,51</sup> Although we pre-screened animals for the absence of  
280 NAb against AAV8, one animal in our study was found to have a pre-existing T-cell response.  
281 Also, the AAV vectors in our study were not generated under Good Medical Practice (GMP)  
282 conditions, and may exhibit greater immunogenicity. In addition, although NHPs are excellent  
283 preclinical models due to their similar ocular anatomy and immune responses, they do not mount  
284 the same level of AAV-specific T-cell responses as humans in liver-directed gene transfer,  
285 possibly due to differences in AAV life cycles between humans and NHPs, more efficient  
286 recruitment of primed human T-cells to the liver,<sup>52-54</sup> or loss of inhibitory sialic acid-recognizing  
287 Ig superfamily lectins on human T-cells. Finally, because two animals in our study also had  
288 subretinal AAV injections in their contralateral eyes, their immune responses may not fully reflect  
289 the consequences of suprachoroidal delivery. However, as previous studies have shown that  
290 subretinal injections elicit minimal humoral or cellular responses,<sup>13,37</sup> we believe that the immune  
291 responses in these animals are more likely attributable to the suprachoroidal injections.

292         Suprachoroidal injection of AAV8 is currently under evaluation in human clinical trials for  
293 expressing a monoclonal antibody fragment to neutralize vascular endothelial growth factor for  
294 treatment of neovascular age-related macular degeneration. Unlike the GFP transgene in our study

295 which is a known immunogen and not native to primate species,<sup>55</sup> these ongoing human trials  
296 employ human-based transgenes and are less likely to generate as robust an immune response. Our  
297 study also employed a CMV promoter which has been associated with ocular toxicity not  
298 otherwise observed using photoreceptor-specific promoters for AAV transgene expression.<sup>56</sup>  
299 Future studies that employ human-derived and more clinically-relevant promoters and transgenes  
300 could better predict host immune responses after suprachoroidal AAV injections, and help  
301 facilitate clinical translation of this unique route of vector delivery for retinal gene therapy.

302

303

304

305

## 306 **Materials and Methods**

### 307 Animals

308 The California National Primate Research Center (CNPRC) is accredited by the  
309 Association for Assessment and Accreditation of Laboratory Animal Care (AAALAC)  
310 International. All studies using rhesus macaques (*Macaca mulatta*) followed the guidelines of the  
311 Association for Research in Vision and Ophthalmology (ARVO) Statement for the Use of Animals  
312 in Ophthalmic and Vision Research, and complied with the National Institutes of Health (NIH)  
313 Guide for the Care and Use of Laboratory Animals. All procedures were conducted under protocols  
314 approved by the University of California, Davis Institutional Animal Care and Use Committee  
315 (IACUC).

### 316 AAV8 production and intraocular injection

317 The AAV cis construct which expresses enhanced GFP under a CMV promoter was  
318 packaged into AAV8 capsid and purified by the UC Davis NEI Vision Molecular Construct and  
319 Packaging Core. After animal sedation, eyes were sterilely prepped with 1% povidone-iodine and  
320 flushed with sterile saline, followed by placement of an eyelid speculum. For transcleral  
321 microneedle injections, a 700  $\mu\text{m}$ -long 30-gauge microneedle (Clearside Biomedical) was inserted  
322 through the conjunctiva and sclera at 4 mm or 10 mm posterior to the corneal limbus to inject into  
323 in the superotemporal quadrant (single 100  $\mu\text{L}$  injection) of left eyes, and both superotemporal and  
324 inferonasal quadrants (two 50  $\mu\text{L}$  injections) of right eyes. For intravitreal injections, a 0.5 inch-  
325 long 30-gauge needle (BD biosciences) was inserted through the pars plana, 4 mm posterior to the  
326 limbus, in the inferotemporal quadrant (single 100  $\mu\text{L}$  injection) of both eyes. The viral  
327 concentrations are reported in Supplementary Figure 1. Intraocular pressure (IOP) was measured



328 following intraocular injections, and an anterior chamber tap was performed using a 30-gauge  
329 needle to remove aqueous until the IOP was normalized.

330 Rhesus 02 which received high-dose suprachoroidal AAV8 showed signs of ocular  
331 irritation and was found to have mild AC cells at 2 weeks after the injection, and was treated with  
332 oral prednisone (1mg/kg) for 2 weeks. In Rhesus 03, 04, and 05, a 40 mg periorbital subtenon  
333 injection of triamcinolone acetonide suspension (Kenalog-40, Bristol-Myers-Squibb) was also  
334 given in the superotemporal quadrant at the request of the veterinarian to prevent uveitis.

### 335 Imaging

336 All animals underwent SLO and SD-OCT imaging using the Spectralis HRA+OCT device  
337 (Heidelberg Engineering, Heidelberg, Germany) before and at 1 week, 1 month, and 2 or 3 months  
338 after AAV injections. Confocal SLO was used to capture 55° x 55° or 30° x 30° fluorescence  
339 images using 488 nm excitation light and a long-pass barrier filter starting at 500 nm. Images were  
340 captured from the central macula and from the peripheral retina by manually steering the Spectralis  
341 device. Due to the facial contour of these animals, the superior quadrants could be seen on live  
342 visualization but was difficult to capture at sufficient quality for image montage. SD-OCT was  
343 performed alongside infrared reflectance images using an 820 nm diode laser to capture 30° x 5°  
344 SD-OCT raster scans with 1536 A-scans per B-scan and 234 µm spacing between B-scans, in high-  
345 resolution mode. SD-OCT scans were captured from the central macula and in regions of visible  
346 GFP fluorescence, especially near the junction between transduced and untransduced tissues. 25  
347 scans were averaged for each B-scan, using the Heidelberg eye tracking Automatic Real-Time  
348 (ART) software. Animals also underwent color fundus photography (CF-1, Canon) for  
349 documentation of clinical exam findings when possible.

### 350 PBMC and splenocyte collection

351 For PBMC isolation, anticoagulated blood was diluted in phosphate buffered saline (PBS),  
352 layered over Ficoll Paque Premium (GE Healthcare, 17544202), and centrifuged for 30 minutes at  
353 800 x g. The PBMC fraction was transferred to PBS and centrifuged again, followed by lysis of  
354 red blood cells using Ammonium-Chloride-Potassium (ACK) lysis buffer (Gibco, A1049201),  
355 washing with Roswell Park Memorial Institute (RPMI) buffer, and resuspension in 10% dimethyl  
356 sulfoxide (DMSO) in heat-inactivated fetal bovine saline (FBS). For splenocyte collection, spleen  
357 tissues were homogenized in sterile PBS, passed through a cell strainer, centrifuged, then  
358 resuspended in ACK lysis buffer, washed with PBS, and resuspended in 10% DMSO in FBS.

### 359 Binding antibody assay

360 Binding antibody assays were performed to detect antibodies against GFP and AAV capsid  
361 in NHP sera as described previously.<sup>38</sup> For anti-AAV8 antibody detection, a sandwich-ELISA kit  
362 designed for AAV8 titration was used (Progen, PRAAV8). Briefly, microtiter strips with AAV8-  
363 specific antibodies were incubated with AAV8 particles ( $2 \times 10^{12}$  vg/mL) overnight at 4°C, blocked  
364 with 5% milk in PBS, then incubated with macaque sera (1:1000 dilution) at 37°C for 2 hours.  
365 After washing, the strips were incubated with horse radish peroxidase (HRP)-conjugated anti-  
366 rhesus secondary antibodies (Southern biotech, 6200-50, 1:2000) for 2 additional hours at room  
367 temperature, incubated with 3,3',5,5'-tetramethylbenzidine (TMB; Southern Biotech, 0410-01),  
368 stopped with a stopping solution (Southern Biotech, 0412-01), then read with a plate reader (Fisher  
369 Scientific accuSkan FC, N16612) with 450 nm absorbance. For detecting anti-GFP antibodies, a  
370 96-well plate was coated with enhanced GFP protein (BioVision, 4999-100, 5 µg/mL) overnight  
371 at 4°C, blocked with 5% non-fat milk in PBS, then incubated with diluted serum samples (1:5000)  
372 at 37°C for 2 hours followed by detection with HRP-conjugated anti-rhesus IgG as described above.  
373 Commercial anti-AAV8 (Progen, 610160S, 1:100) and anti-GFP (Abcam, ab6556, 1:1000)

374 antibodies were used as positive controls, and all values were determined from triplicates. The  
375 antibodies were calculated against a standard curve and normalized with total protein.

376 Enzyme-linked immune absorbent spot (ELISpot)

377 ELISpot assays to detect IFN- $\gamma$ -secreting cells from PBMCs were performed with a  
378 commercial kit according to the manufacturer's instruction (U-CyTech, CT121). Briefly, a 96-well  
379 PVDF membrane-bottomed plate was activated with 70% ethanol, and coated with anti-IFN- $\gamma$   
380 antibodies overnight at 4°C. After washing and blocking, PBMCs were seeded at  $4 \times 10^5$  cells per  
381 well in RPMI-160 media containing a mix of 182 AAV8 capsid or enhanced GFP peptides (15mers  
382 and 11 overlaps, 4 ng/uL, JPT, PM-AAV8-CP, PM-EGFP) for 48 hours. We incubated the cells  
383 with Phorbol 12-myristate 13-acetate (PMA, 80 nM) and ionomycin (1.3  $\mu$ M) for positive control,  
384 and DMSO (0.05%) for negative control. After removing the cells, the plate was incubated with  
385 biotinylated detection antibody for 2 hours followed by Streptavidin-HRP and 3-Amino-9-  
386 ethylcarbazole (AEC) substrate. Spots were counted and normalized with negative control. Spot  
387 forming unit (SFU) was calculated from triplicates converted to SFU per  $10^6$  cells.

388 Quantitative polymerase chain reaction

389 Systemic biodistribution assays were performed using qPCR with SYBR Green. Liver,  
390 spleen and kidney samples were collected at necropsy, and genomic DNA (gDNA) extracted using  
391 a commercial kit following the manufacturer's instruction (Qiagen, 69504). For qPCR, each  
392 reaction contained 10 ng of gDNA with SYBR green qPCR master mix (Invitrogen) and forward  
393 and reverse primers. qPCR cycling was 95° for 10 min, and 40 cycles of 95° for 10 min, 60° for 1  
394 min, and melting curve analysis was performed for primer dimers. Copy number of GFP transgene  
395 was calculated against standard curve, and rhesus beta actin primer set was used as an internal

396 control in a separate reaction. The primer sets used in this study are enhanced GFP forward 5'-  
397 AGATCCGCCACAACATCGAGG-3', GFP reverse 5'-AGCAGGACCATGTGATCGC-3',  
398 beta-actin forward 5'-GGGCCGGACTCGTCATAC-3' and beta-actin reverse 5'-  
399 CCTGGCACCCAGCACAAT-3'. The limit of detection was 162 copies/ $\mu$ g DNA.

#### 400 Immunohistochemistry

401 Immunohistochemistry was performed as described previously.<sup>21</sup> Posterior eye cups were  
402 fixed with 4% paraformaldehyde (PFA) for 2 hours after removal of anterior segments lens and  
403 vitreous. After washing with PBS, tissues were cryoprotected with 30% sucrose overnight, then  
404 embedded and cryosectioned at 18 $\mu$ m. For antibody labelling, sections were washed with PBS,  
405 blocked with 10% normal donkey serum for 30 min, then incubated in primary antibody for 1-2  
406 hours at room temperature, followed by Alexa Fluor-conjugated secondary antibodies. Primary  
407 antibodies include IBA-1 (Wako, AB10558, 1:100), GFAP (Dako, Z0334, 1:200), and CD45 (BD,  
408 552566, 2.5 $\mu$ g/ml).

#### 409 Flowcytometry

410 For flow cytometry, 0.5 x 10<sup>6</sup> PBMCs or splenocytes per well were plated in duplicate in  
411 96-well plates in RPMI supplemented with 10% FBS for 24 hours. The cells were stimulated with  
412 AAV8 peptide (4ng/ $\mu$ l, JPT, PM-AAV8-CP), GFP peptide (4ng/ $\mu$ l, JPT, PM-EGFP), cRPMI alone  
413 (unstimulated), or with PMA (80 nM)-Ionomycin(1.3  $\mu$ M) (positive control). Cultures were  
414 incubated at 37°C for 48 hours, washed with PBS, and stained for flow cytometric analysis. The  
415 cells were incubated with 50 $\mu$ L of an antibody cocktail for CD8 (Thermo Fisher, Q10055),  
416 HLADR (BioLegend, 307656), CD19 (BioLegend, 302239), CD27 (Biolegend, 302824), and  
417 CD38 (Labcome, 100825) for 30 minutes at room temperature in the dark, followed by 2 washes

418 with FACS buffer (PBS + 1% FBS), and resuspended in 300  $\mu$ L of FACS buffer for analysis. The  
419 data were acquired within an hour on a BD FACS LSR II flow cytometer (Beckman Coulter Life  
420 Sciences, USA).

421

## 422 **Acknowledgements**

423 We thank Marie Burns and Huaiyang Chen for AAV production, Amanda Carpenter for PBMC  
424 and splenocyte preparation, Jeffrey Roberts and John Morrison for CNPRC logistics, Monica  
425 Motta for assistance with animal imaging, and Dennis Hartigan-O'Connor for discussions. We  
426 also thank Clearside Biomedical and Glenn Noronha, Jesse Yoo, and Donna Taraborelli for  
427 providing the suprachoroidal microneedles used in our study. This study was supported by the  
428 California National Primate Research Center pilot grant program and base grant NIH  
429 P510D011107. GY is supported by NIH K08 EY026101, NIH R21 EY031108, and Macula  
430 Society. ST is supported by U24 U24EY029904. The AAV8 vector was produced by the Center  
431 for Vision Sciences Molecular Constructs and Packaging core facility supported by NIH P30  
432 EY012576. No funding organizations had any role in the design or conduct of this research. The  
433 content is solely the responsibility of the authors and does not necessarily represent the official  
434 views of the funding agencies.

## 435 **Author Contributions**

436 G.Y conceived the study design, obtained funding, performed the examinations, intraocular  
437 injections, and in vivo imaging, and supervised the study. S.H.C, T.S, and T.N conducted the  
438 binding antibody assays, ELISpot assays, biodistribution studies, and immunohistochemistry. I.M  
439 assisted clinical examination, injections, and tissue collection. A.M conducted flow cytometry and  
440 analyzed data. G.Y and S.H.C analyzed all data and wrote the manuscript. G.Y, S.H.C, T.C, P.S  
441 and S.T critically reviewed the manuscript.

442 **Disclosures / Conflicts of Interest:** G.Y. received research support from Clearside Biomedical,  
443 Genentech, and Iridex, and personal fees for consultancy from Alimera, Allergan, Carl Zeiss

444 Meditec, Clearside Biomedical, Genentech, Iridex, Topcon, and Verily. T.C is an employee with  
445 and has equity ownership in Clearside Biomedical. Transscleral microneedles used in this study  
446 were provided by Clearside Biomedical, and may be requested under Material Transfer Agreement  
447 (MTA).

448

449 References

- 450 1. Bainbridge JWB, Mehat MS, Sundaram V, et al. Long-Term Effect of Gene Therapy on  
451 Leber's Congenital Amaurosis. *New England Journal of Medicine*. 2015;372(20):1887-1897.  
452 doi:10.1056/NEJMoa1414221
- 453 2. Bainbridge JWB, Smith AJ, Barker SS, et al. Effect of Gene Therapy on Visual Function in  
454 Leber's Congenital Amaurosis. *New England Journal of Medicine*. 2008;358(21):2231-2239.  
455 doi:10.1056/NEJMoa0802268
- 456 3. Maguire AM, Simonelli F, Pierce EA, et al. Safety and Efficacy of Gene Transfer for  
457 Leber's Congenital Amaurosis. *New England Journal of Medicine*. 2008;358(21):2240-2248.  
458 doi:10.1056/NEJMoa0802315
- 459 4. Maguire AM, High KA, Auricchio A, et al. Age-dependent effects of RPE65 gene therapy  
460 for Leber's congenital amaurosis: a phase 1 dose-escalation trial. *Lancet*.  
461 2009;374(9701):1597-1605. doi:10.1016/S0140-6736(09)61836-5
- 462 5. Cideciyan AV, Hauswirth WW, Aleman TS, et al. Vision 1 Year after Gene Therapy for  
463 Leber's Congenital Amaurosis. *N Engl J Med*. 2009;361(7):725-727.  
464 doi:10.1056/NEJMc0903652
- 465 6. Hauswirth WW, Aleman TS, Kaushal S, et al. Treatment of Leber Congenital Amaurosis  
466 Due to RPE65 Mutations by Ocular Subretinal Injection of Adeno-Associated Virus Gene  
467 Vector: Short-Term Results of a Phase I Trial. *Hum Gene Ther*. 2008;19(10):979-990.  
468 doi:10.1089/hum.2008.107



- 469 7. Wang D, Tai PWL, Gao G. Adeno-associated virus vector as a platform for gene therapy  
470 delivery. *Nat Rev Drug Discov.* 2019;18(5):358-378. doi:10.1038/s41573-019-0012-9
- 471 8. Manno CS, Pierce GF, Arruda VR, et al. Successful transduction of liver in hemophilia by  
472 AAV-Factor IX and limitations imposed by the host immune response. *Nat Med.*  
473 2006;12(3):342-347. doi:10.1038/nm1358
- 474 9. Wang Z, Allen JM, Riddell SR, et al. Immunity to adeno-associated virus-mediated gene  
475 transfer in a random-bred canine model of Duchenne muscular dystrophy. *Hum Gene Ther.*  
476 2007;18(1):18-26. doi:10.1089/hum.2006.093
- 477 10. Halbert CL, Standaert TA, Aitken ML, Alexander IE, Russell DW, Miller AD. Transduction  
478 by adeno-associated virus vectors in the rabbit airway: efficiency, persistence, and  
479 readministration. *J Virol.* 1997;71(8):5932-5941. Accessed September 14, 2020.  
480 <https://www.ncbi.nlm.nih.gov/pmc/articles/PMC191849/>
- 481 11. Kessler PD, Podsakoff GM, Chen X, et al. Gene delivery to skeletal muscle results in  
482 sustained expression and systemic delivery of a therapeutic protein. *Proc Natl Acad Sci U S*  
483 *A.* 1996;93(24):14082-14087. Accessed September 14, 2020.  
484 <https://www.ncbi.nlm.nih.gov/pmc/articles/PMC19498/>
- 485 12. Xiao W, Chirmule N, Schnell MA, Tazelaar J, Hughes JV, Wilson JM. Route of  
486 Administration Determines Induction of T-Cell-Independent Humoral Responses to Adeno-  
487 Associated Virus Vectors. *Molecular Therapy.* 2000;1(4):323-329.  
488 doi:10.1006/mthe.2000.0045

- 489 13. Li Q, Miller R, Han P-Y, et al. Intraocular route of AAV2 vector administration defines  
490 humoral immune response and therapeutic potential. *Mol Vis*. 2008;14:1760-1769.
- 491 14. Shirley JL, Jong YP de, Terhorst C, Herzog RW. Immune Responses to Viral Gene Therapy  
492 Vectors. *Molecular Therapy*. 2020;28(3):709-722. doi:10.1016/j.ymthe.2020.01.001
- 493 15. Streilein JW. Ocular immune privilege: therapeutic opportunities from an experiment of  
494 nature. *Nat Rev Immunol*. 2003;3(11):879-889. doi:10.1038/nri1224
- 495 16. Barker SE, Broderick CA, Robbie SJ, et al. Subretinal delivery of adeno-associated virus  
496 serotype 2 results in minimal immune responses that allow repeat vector administration in  
497 immunocompetent mice. *J Gene Med*. 2009;11(6):486-497. doi:10.1002/jgm.1327
- 498 17. Bennett J, Ashtari M, Wellman J, et al. AAV2 Gene Therapy Readministration in Three  
499 Adults with Congenital Blindness. *Sci Transl Med*. 2012;4(120):120ra15.  
500 doi:10.1126/scitranslmed.3002865
- 501 18. Dalkara D, Byrne LC, Klimczak RR, et al. In Vivo-Directed Evolution of a New Adeno-  
502 Associated Virus for Therapeutic Outer Retinal Gene Delivery from the Vitreous. *Science*  
503 *Translational Medicine*. 2013;5(189):189ra76-189ra76. doi:10.1126/scitranslmed.3005708
- 504 19. Petrs-Silva H, Dinculescu A, Li Q, et al. Novel Properties of Tyrosine-mutant AAV2  
505 Vectors in the Mouse Retina. *Mol Ther*. 2011;19(2):293-301. doi:10.1038/mt.2010.234
- 506 20. Lukason M, DuFresne E, Rubin H, et al. Inhibition of Choroidal Neovascularization in a  
507 Nonhuman Primate Model by Intravitreal Administration of an AAV2 Vector Expressing a  
508 Novel Anti-VEGF Molecule. *Mol Ther*. 2011;19(2):260-265. doi:10.1038/mt.2010.230

- 509 21. Yiu G, Chung SH, Mollhoff IN, et al. Suprachoroidal and Subretinal Injections of AAV  
510 Using Transscleral Microneedles for Retinal Gene Delivery in Nonhuman Primates.  
511 *Molecular Therapy - Methods & Clinical Development*. 2020;16:179-191.  
512 doi:10.1016/j.omtm.2020.01.002
- 513 22. Ding K, Shen J, Hafiz Z, et al. AAV8-vectored suprachoroidal gene transfer produces  
514 widespread ocular transgene expression. *J Clin Invest*. 2019;129(11):4901-4911.  
515 doi:10.1172/JCI129085
- 516 23. Yiu G, Pecan P, Sarin N, et al. Characterization of the Choroid-Scleral Junction and  
517 Suprachoroidal Layer in Healthy Individuals on Enhanced-Depth Imaging Optical  
518 Coherence Tomography. *JAMA Ophthalmol*. 2014;132(2):174-181.  
519 doi:10.1001/jamaophthalmol.2013.7288
- 520 24. Emami-Naeini P, Yiu G. Medical and Surgical Applications for the Suprachoroidal Space.  
521 *Int Ophthalmol Clin*. 2019;59(1):195-207. doi:10.1097/IIO.0000000000000251
- 522 25. Willoughby AS, Vuong VS, Cunefare D, et al. Choroidal Changes after Suprachoroidal  
523 Injection of Triamcinolone in Eyes with Macular Edema Secondary to Retinal Vein  
524 Occlusion. *Am J Ophthalmol*. 2018;186:144-151. doi:10.1016/j.ajo.2017.11.020
- 525 26. Lampen SIR, Khurana RN, Noronha G, Brown DM, Wykoff CC. Suprachoroidal Space  
526 Alterations Following Delivery of Triamcinolone Acetonide: Post-Hoc Analysis of the Phase  
527 1/2 HULK Study of Patients With Diabetic Macular Edema. *Ophthalmic Surg Lasers  
528 Imaging Retina*. 2018;49(9):692-697. doi:10.3928/23258160-20180831-07

- 529 27. Kim YC, Edelhauser HF, Prausnitz MR. Targeted Delivery of Antiglaucoma Drugs to the  
530 Supraciliary Space Using Microneedles. *Invest Ophthalmol Vis Sci.* 2014;55(11):7387-7397.  
531 doi:10.1167/iovs.14-14651
- 532 28. Olsen TW, Feng X, Wabner K, et al. Cannulation of the Suprachoroidal Space: A Novel  
533 Drug Delivery Methodology to the Posterior Segment. *American Journal of Ophthalmology.*  
534 2006;142(5):777-787.e2. doi:10.1016/j.ajo.2006.05.045
- 535 29. Olsen TW, Feng X, Wabner K, Csaky K, Pambuccian S, Cameron JD. Pharmacokinetics of  
536 Pars Plana Intravitreal Injections versus Microcannula Suprachoroidal Injections of  
537 Bevacizumab in a Porcine Model. *Invest Ophthalmol Vis Sci.* 2011;52(7):4749-4756.  
538 doi:10.1167/iovs.10-6291
- 539 30. Patel SR, Berezovsky DE, McCarey BE, Zarnitsyn V, Edelhauser HF, Prausnitz MR.  
540 Targeted Administration into the Suprachoroidal Space Using a Microneedle for Drug  
541 Delivery to the Posterior Segment of the Eye. *Invest Ophthalmol Vis Sci.* 2012;53(8):4433-  
542 4441. doi:10.1167/iovs.12-9872
- 543 31. Patel SR, Lin ASP, Edelhauser HF, Prausnitz MR. Suprachoroidal Drug Delivery to the  
544 Back of the Eye Using Hollow Microneedles. *Pharm Res.* 2011;28(1):166-176.  
545 doi:10.1007/s11095-010-0271-y
- 546 32. Yeh S, Khurana RN, Shah M, et al. Efficacy and Safety of Suprachoroidal CLS-TA for  
547 Macular Edema Secondary to Noninfectious Uveitis: Phase 3 Randomized Trial.  
548 *Ophthalmology.* 2020;127(7):948-955. doi:10.1016/j.ophtha.2020.01.006

- 549 33. Yiu G, Vuong VS, Oltjen S, et al. Effect of Uveal Melanocytes on Choroidal Morphology in  
550 Rhesus Macaques and Humans on Enhanced-Depth Imaging Optical Coherence  
551 Tomography. *Invest Ophthalmol Vis Sci.* 2016;57(13):5764. doi:10.1167/iovs.16-20070
- 552 34. Vandamme C, Adjali O, Mingozzi F. Unraveling the Complex Story of Immune Responses  
553 to AAV Vectors Trial After Trial. *Hum Gene Ther.* 2017;28(11):1061-1074.  
554 doi:10.1089/hum.2017.150
- 555 35. Calcedo R, Vandenberghe LH, Gao G, Lin J, Wilson JM. Worldwide Epidemiology of  
556 Neutralizing Antibodies to Adeno-Associated Viruses. *J Infect Dis.* 2009;199(3):381-390.  
557 doi:10.1086/595830
- 558 36. MacLachlan TK, Lukason M, Collins M, et al. Preclinical Safety Evaluation of AAV2-  
559 sFLT01— A Gene Therapy for Age-related Macular Degeneration. *Mol Ther.*  
560 2011;19(2):326-334. doi:10.1038/mt.2010.258
- 561 37. Reichel FF, Peters T, Wilhelm B, et al. Humoral Immune Response After Intravitreal But  
562 Not After Subretinal AAV8 in Primates and Patients. *Invest Ophthalmol Vis Sci.*  
563 2018;59(5):1910-1915. doi:10.1167/iovs.17-22494
- 564 38. Reichel FF, Dauletbekov DL, Klein R, et al. AAV8 Can Induce Innate and Adaptive Immune  
565 Response in the Primate Eye. *Mol Ther.* 2017;25(12):2648-2660.  
566 doi:10.1016/j.ymthe.2017.08.018
- 567 39. Osusky R, Dorio RJ, Arora YK, Ryan SJ, Walker SM. MHC class II positive retinal pigment  
568 epithelial (RPE) cells can function as antigen-presenting cells for microbial superantigen.  
569 *Ocul Immunol Inflamm.* 1997;5(1):43-50. doi:10.3109/09273949709085049

- 570 40. Lipski DA, Dewispelaere R, Foucart V, et al. MHC class II expression and potential antigen-  
571 presenting cells in the retina during experimental autoimmune uveitis. *J Neuroinflammation*.  
572 2017;14(1):136. doi:10.1186/s12974-017-0915-5
- 573 41. Schlereth SL, Kremers S, Schrödl F, Cursiefen C, Heindl LM. Characterization of Antigen-  
574 Presenting Macrophages and Dendritic Cells in the Healthy Human Sclera. *Invest*  
575 *Ophthalmol Vis Sci*. 2016;57(11):4878-4885. doi:10.1167/iovs.15-18552
- 576 42. Karpinich NO, Caron KM. Schlemm's canal: more than meets the eye, lymphatics in  
577 disguise. *J Clin Invest*. 2014;124(9):3701-3703. doi:10.1172/JCI77507
- 578 43. Kotterman MA, Yin L, Strazzeri JM, Flannery JG, Merigan WH, Schaffer DV. Antibody  
579 neutralization poses a barrier to intravitreal adeno-associated viral vector gene delivery to  
580 non-human primates. *Gene Ther*. 2015;22(2):116-126. doi:10.1038/gt.2014.115
- 581 44. Wang L, Calcedo R, Bell P, et al. Impact of pre-existing immunity on gene transfer to  
582 nonhuman primate liver with adeno-associated virus 8 vectors. *Hum Gene Ther*.  
583 2011;22(11):1389-1401. doi:10.1089/hum.2011.031
- 584 45. Fitzpatrick Z, Leborgne C, Barbon E, et al. Influence of Pre-existing Anti-capsid  
585 Neutralizing and Binding Antibodies on AAV Vector Transduction. *Mol Ther Methods Clin*  
586 *Dev*. 2018;9:119-129. doi:10.1016/j.omtm.2018.02.003
- 587 46. Amado D, Mingozzi F, Hui D, et al. Safety and efficacy of subretinal readministration of a  
588 viral vector in large animals to treat congenital blindness. *Sci Transl Med*.  
589 2010;2(21):21ra16. doi:10.1126/scitranslmed.3000659

- 590 47. Seitz IP, Michalakis S, Wilhelm B, et al. Superior Retinal Gene Transfer and Biodistribution  
591 Profile of Subretinal Versus Intravitreal Delivery of AAV8 in Nonhuman Primates. *Invest*  
592 *Ophthalmol Vis Sci*. 2017;58(13):5792. doi:10.1167/iovs.17-22473
- 593 48. Calcedo R, Wilson JM. Humoral Immune Response to AAV. *Front Immunol*. 2013;4.  
594 doi:10.3389/fimmu.2013.00341
- 595 49. Boutin S, Monteilhet V, Veron P, et al. Prevalence of serum IgG and neutralizing factors  
596 against adeno-associated virus (AAV) types 1, 2, 5, 6, 8, and 9 in the healthy population:  
597 implications for gene therapy using AAV vectors. *Hum Gene Ther*. 2010;21(6):704-712.  
598 doi:10.1089/hum.2009.182
- 599 50. Gao G, Alvira MR, Somanathan S, et al. Adeno-associated viruses undergo substantial  
600 evolution in primates during natural infections. *Proc Natl Acad Sci USA*.  
601 2003;100(10):6081-6086. doi:10.1073/pnas.0937739100
- 602 51. Calcedo R, Morizono H, Wang L, et al. Adeno-associated virus antibody profiles in  
603 newborns, children, and adolescents. *Clin Vaccine Immunol*. 2011;18(9):1586-1588.  
604 doi:10.1128/CVI.05107-11
- 605 52. Guidotti LG, Iannacone M. Effector CD8 T cell trafficking within the liver. *Mol Immunol*.  
606 2013;55(1):94-99. doi:10.1016/j.molimm.2012.10.032
- 607 53. Lang KS, Georgiev P, Recher M, et al. Immunoprivileged status of the liver is controlled by  
608 Toll-like receptor 3 signaling. *J Clin Invest*. 2006;116(9):2456-2463. doi:10.1172/JCI28349

- 609 54. Nguyen DH, Hurtado-Ziola N, Gagneux P, Varki A. Loss of Siglec expression on T  
610 lymphocytes during human evolution. *Proc Natl Acad Sci USA*. 2006;103(20):7765-7770.  
611 doi:10.1073/pnas.0510484103
- 612 55. Ansari AM, Ahmed AK, Matsangos AE, et al. Cellular GFP Toxicity and Immunogenicity:  
613 Potential Confounders in in Vivo Cell Tracking Experiments. *Stem Cell Rev Rep*.  
614 2016;12(5):553-559. doi:10.1007/s12015-016-9670-8
- 615 56. Huang X, Zhou G, Wu W, et al. Genome editing abrogates angiogenesis in vivo. *Nature*  
616 *Communications*. 2017;8(1):112. doi:10.1038/s41467-017-00140-3
- 617
- 618



619 **Figures**

620 **Figure 1.**

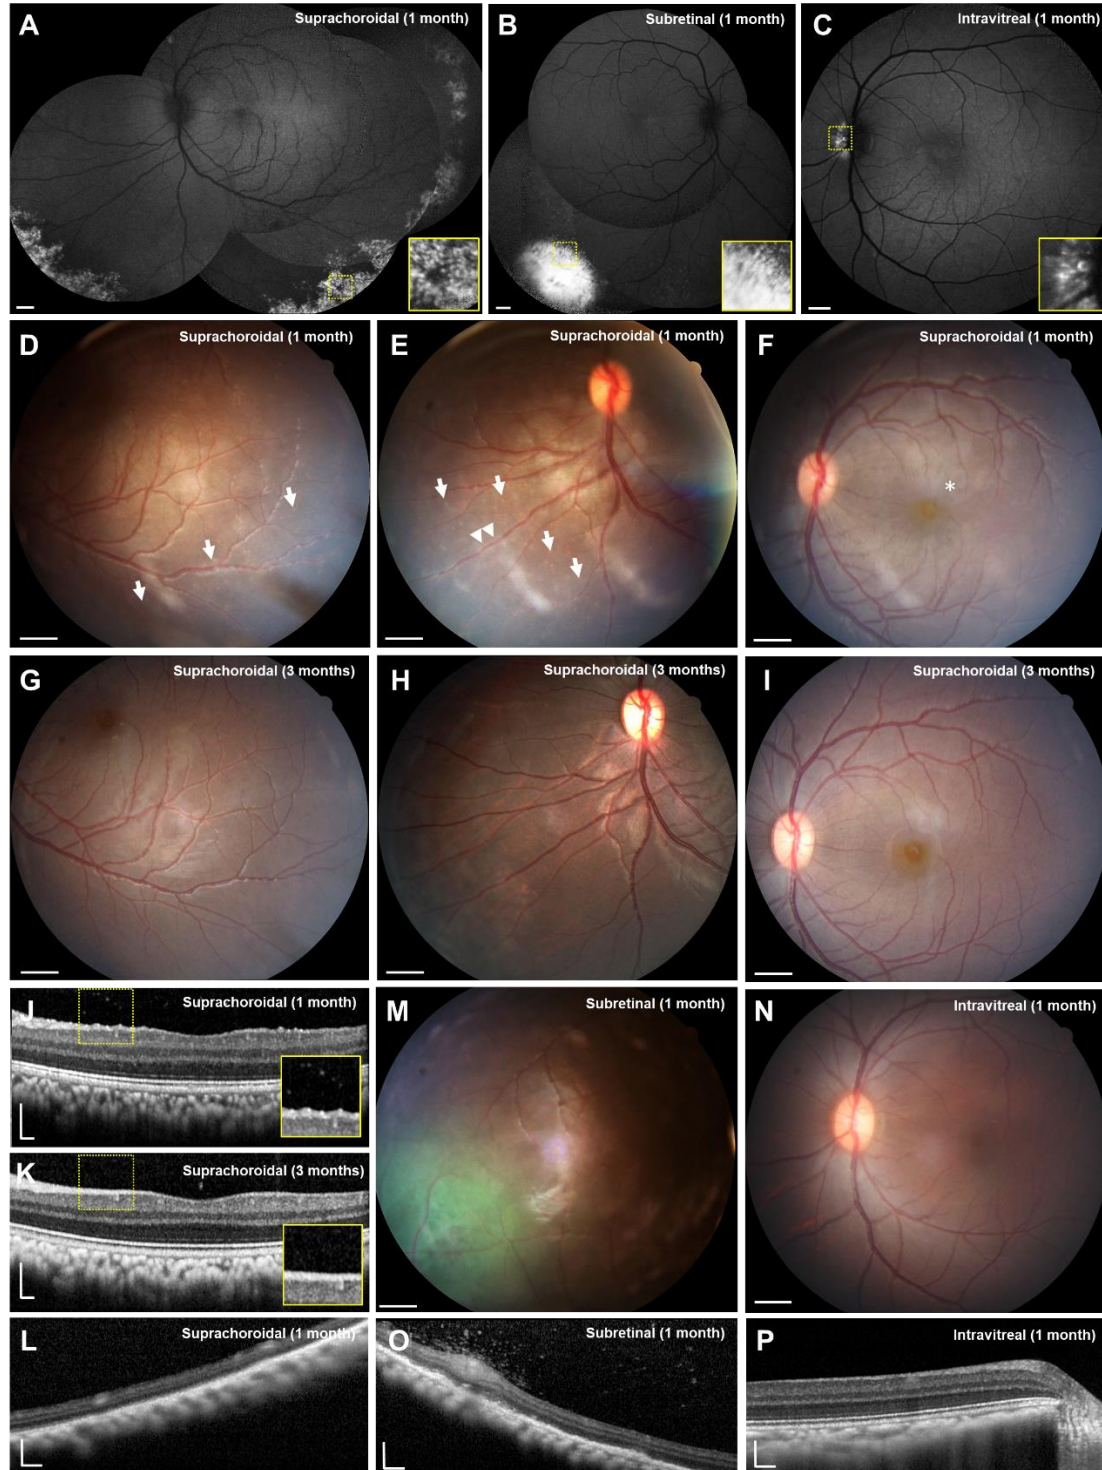

621

622 Figure 2.

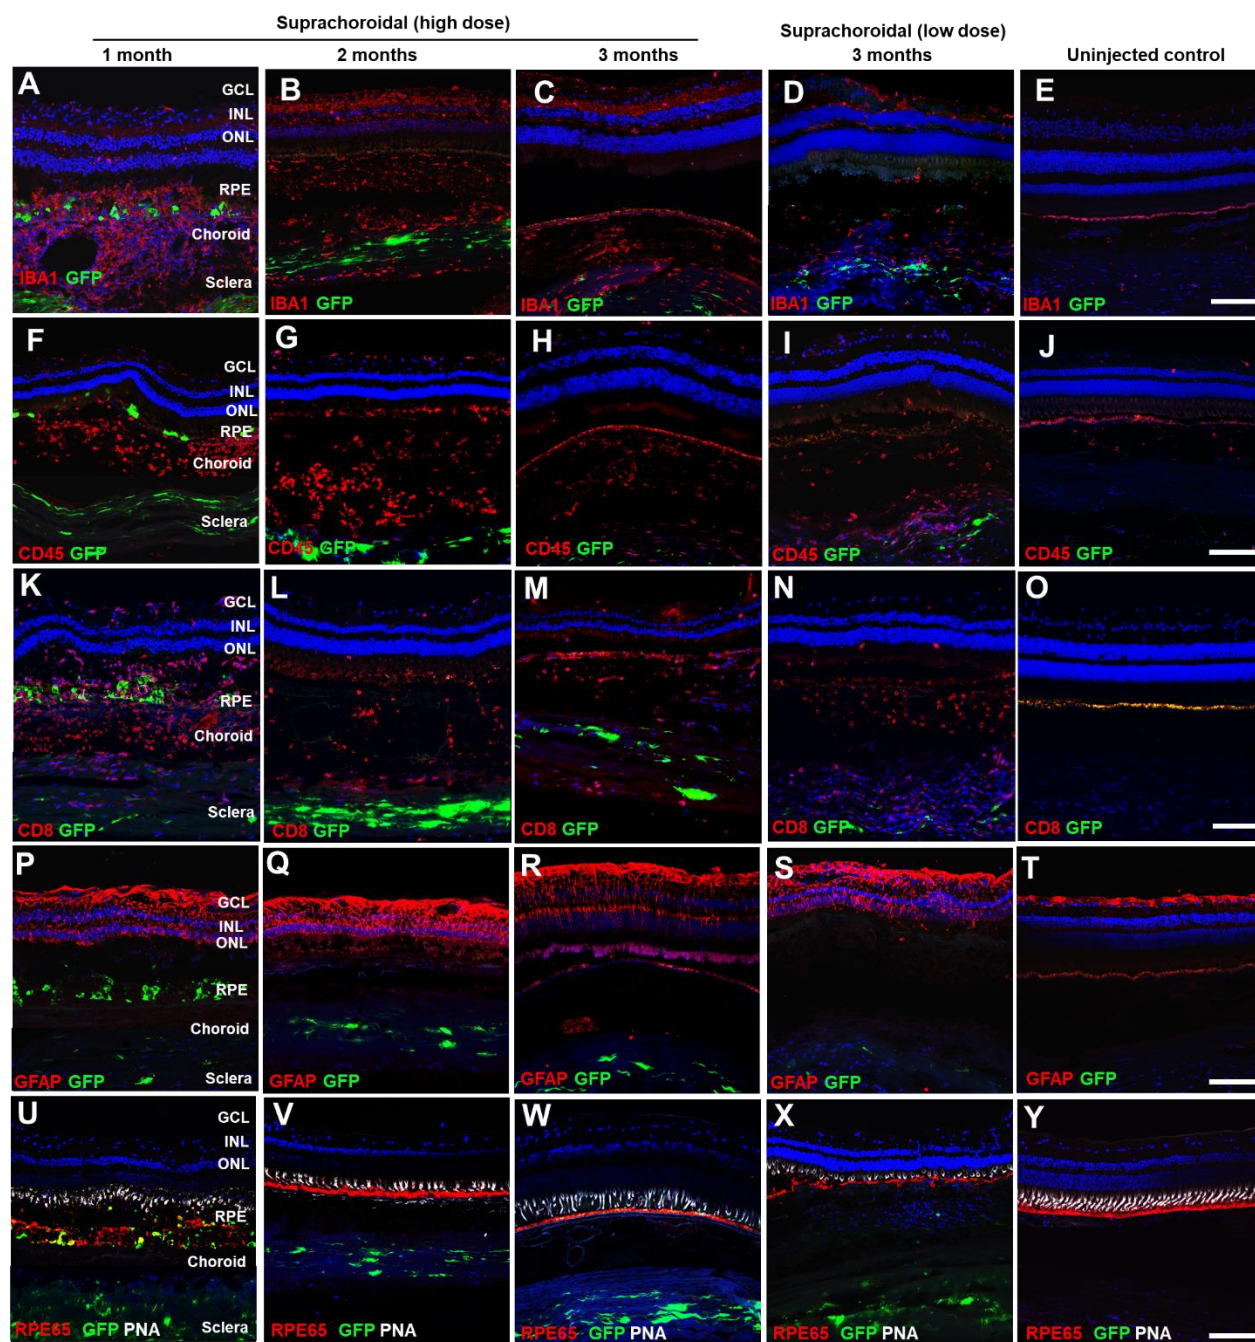

623

624

625 Figure 3.

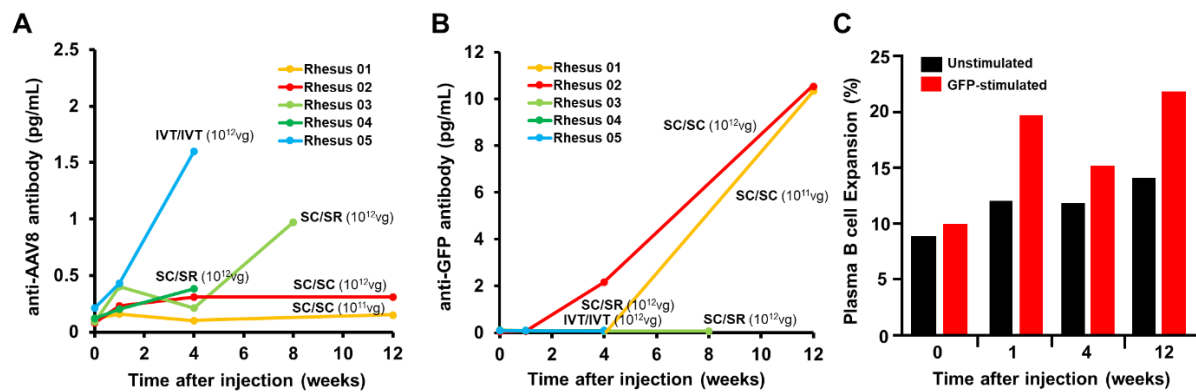

626

627

628

629 Figure 4.

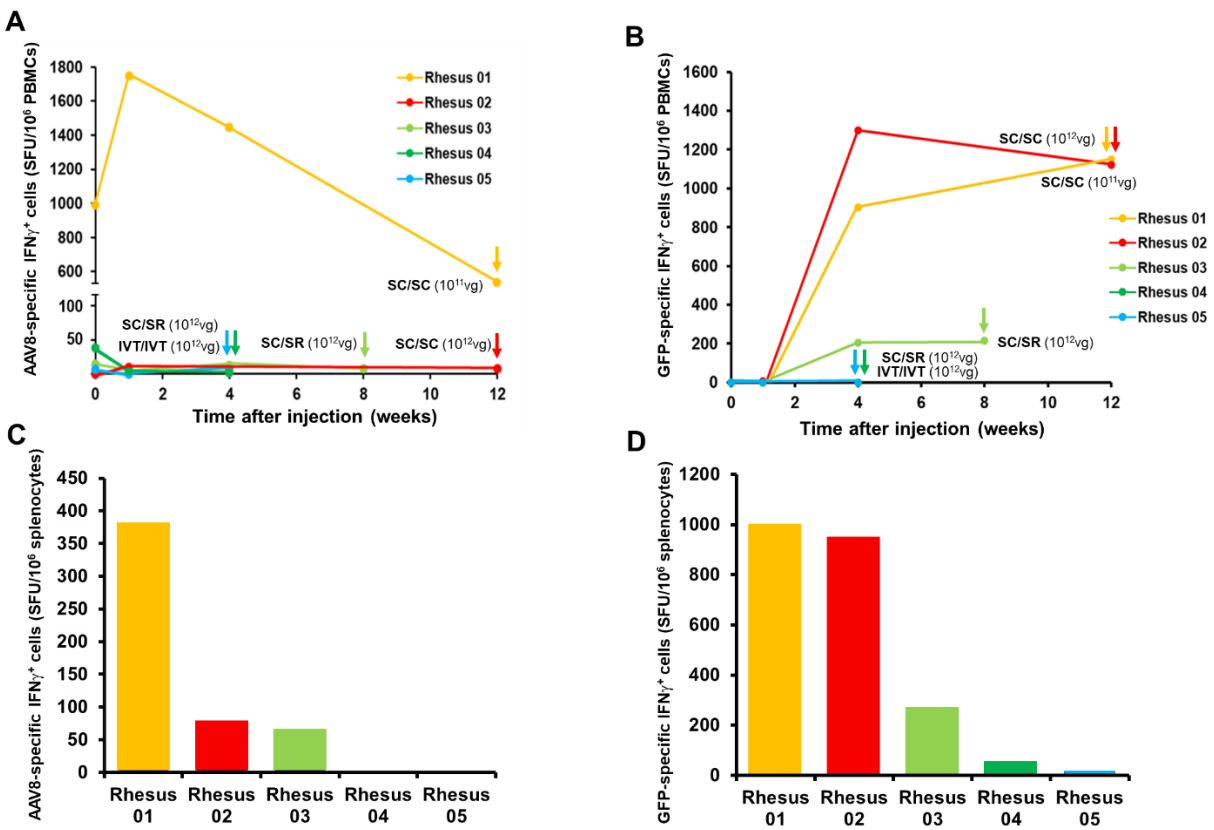

630

631



632 Figure 5.

633

634

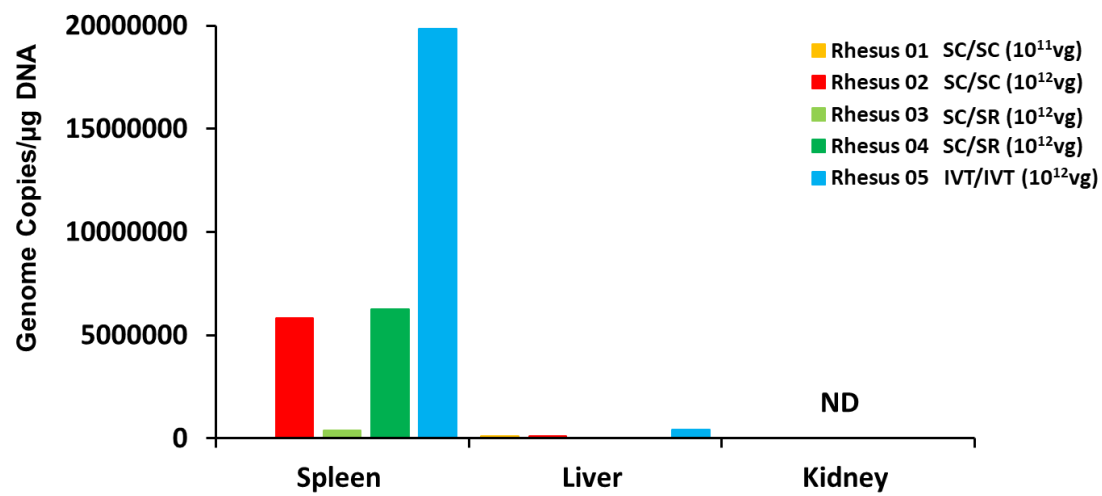

635

636

637 Supplementary Table 1

| <b>Animal ID</b> | <b>Age (Years)</b> | <b>Sex</b> | <b>Injection Mode (OD/OS)</b> | <b>Viral Dose (vg/eye)</b> | <b>Necropsy Date</b> |
|------------------|--------------------|------------|-------------------------------|----------------------------|----------------------|
| Rhesus 01        | 10.25              | Female     | SC/SC                         | 7x10 <sup>11</sup> vg      | Month 3              |
| Rhesus 02        | 9.05               | Female     | SC/SC                         | 7x10 <sup>12</sup> vg      | Month 3              |
| Rhesus 03        | 5.47               | Male       | SR/SC                         | 7x10 <sup>12</sup> vg      | Month 2              |
| Rhesus 04        | 9.38               | Female     | SR/SC                         | 7x10 <sup>12</sup> vg      | Month 1              |
| Rhesus 05        | 10.38              | Male       | IVT/IVT                       | 7x10 <sup>12</sup> vg      | Month 1              |

638

639 Abbreviations: OD, right eye; OS, left eye; IVT, intravitreal; SC, suprachoroidal; SR, subretinal; vg, viral genome

640 Supplementary Figure 1

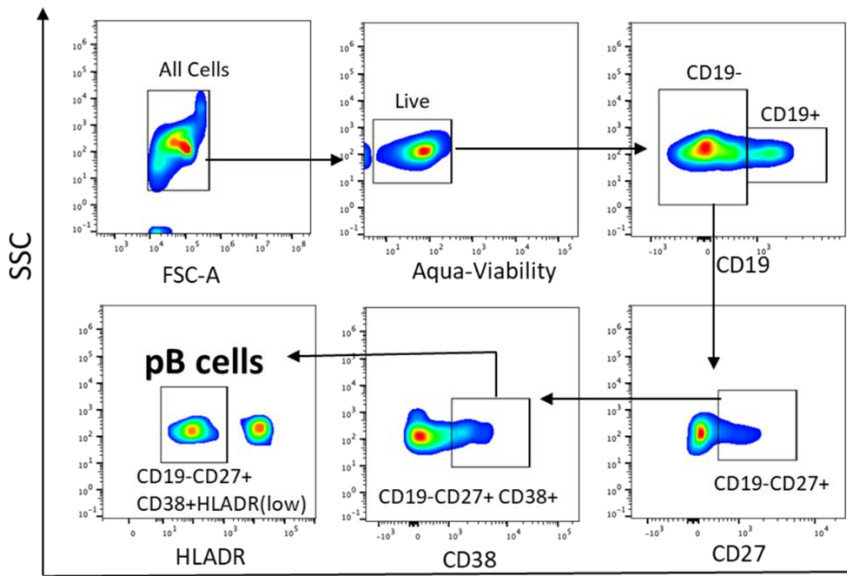

641

642

643 **Figure Legends**

644 **[Figure 1]** Multimodal ocular imaging after suprachoroidal, subretinal, or intravitreal injections  
645 of AAV8 to express enhanced GFP in NHP eyes. **(A-C)** Representative scanning laser  
646 ophthalmoscopy (SLO) montages and magnified insets of the yellow-dashed regions show  
647 different patterns of GFP transgene expression at 1 month after suprachoroidal (A), subretinal (B),  
648 and intravitreal (C) AAV delivery. **(D-I)** Representative color fundus photographs demonstrate  
649 punctate spots (arrows), perivascular sheathing (arrowheads), and radial macular striae (asterisk)  
650 that are observed after suprachoroidal AAV8 injections at 1 month (D-F), but resolved by 3 months  
651 (G-I), consistent with a transient chorioretinitis and vasculitis. **(J-L)** Representative spectral-  
652 domain optical coherence tomography (SD-OCT) images and magnified insets of the yellow-  
653 dashed regions reveal hyperreflective foci seen after suprachoroidal AAV8 at 1 month (J) but not  
654 at 3 months (K) or in peripheral retina (L). **(M-N)** Fundus photographs of macaque eyes  
655 demonstrate GFP fluorescence after subretinal AAV8 (M), and no clear inflammation after  
656 subretinal or intravitreal AAV8 (N). **(O-P)** SD-OCT images showed that subretinal AAV8 also  
657 induced cellular extravasation from retinal vessels suggestive of a localized vasculitis (O), but not  
658 after intravitreal injections (P). Scale bars, 1 mm for SLO images and fundus photos; 200  $\mu$ m for  
659 SD-OCT images.

660

661 **[Figure 2]** Local immune cell infiltration after suprachoroidal delivery of AAV8 in NHP eyes. **(A-**  
662 **Y)** Confocal fluorescence images of GFP transgene expression (green) co-immunostained with  
663 antibodies to IBA-1+ microglial cells (A-E), CD45+ leukocytes (F-J), CD8+ cytotoxic T-cells (K-  
664 O), and GFAP+ reactive gliosis (P-T), as well as RPE65 (red) to label RPE cells and peanut  
665 agglutinin (PNA, white) to label cone photoreceptor inner/out segments, along with DAPI (blue)



666 to label cell nuclei in eyes at 1 month (A,F,K,P,U), 2 months (B,G,L,Q,V), and 3 months  
667 (C,H,M,R,W) after high-dose or low-dose (D,I,N,S,X) suprachoroidal AAV8 injections, as  
668 compared to uninjected control eyes (E,J,O,T,V). Abbreviations: GCL, ganglion cell layers; INL,  
669 inner nuclear layer; ONL, outer nuclear layer; RPE, retinal pigment epithelium. Scale bars: 100 $\mu$ m.

670

671 **[Figure 3]** B cell-mediated humoral immune responses against AAV8 and GFP after  
672 suprachoroidal injections in NHP eyes. **(A-B)** Line plots compare serum anti-AAV8 antibody (A)  
673 and anti-GFP antibody (B) levels in rhesus macaques before and after bilateral suprachoroidal  
674 (SC/SC), suprachoroidal / subretinal (SC/SR), or bilateral intravitreal (IVT/IVT) AAV8 injections.  
675 **(C)** Bar graphs show flow cytometry analysis of plasma B-cells with expansion upon GFP peptide  
676 stimulation from PBMCs collected at various time points after high-dose suprachoroidal AAV8  
677 injections into both eyes in Rhesus 02.

678

679 **[Figure 4]** T cell-mediated immune responses against AAV8 and GFP after suprachoroidal  
680 injection. **(A-B)** Line plots compare IFN- $\gamma$ -producing T-cell response against AAV8 capsid (A)  
681 and GFP transgene (B) in peripheral blood mononuclear cells (PBMCs) before and after bilateral  
682 suprachoroidal (SC/SC), suprachoroidal / subretinal (SC/SR), or bilateral intravitreal (IVT/IVT)  
683 AAV8 injections. **(C-D)** Bar plots compare IFN- $\gamma$ -producing T-cell response against AAV8 capsid  
684 (C) and GFP transgene (D) from splenocytes collected at necropsy, as indicated by the  
685 corresponding colored arrows for each animal. Abbreviations: SFU, spot-forming units; IFN- $\gamma$ ,  
686 interferon gamma

687

688 **[Figure 5]** Systemic biodistribution of AAV8 after suprachoroidal injections. Bar graphs show  
689 quantification of virally-encoded GFP genome copies measured from peripheral organs including  
690 spleen, liver and kidney that were collected at the time of necropsy. Abbreviations: ND, not  
691 detected; IVT, intravitreal; SC, suprachoroidal; SR, subretinal.

692

693 **[Supplementary Table 1]** Summary of study animals, demographic, injection mode, dose and  
694 necropsy dates. Abbreviations: OD, right eye; OS, left eye; IVT, intravitreal; SC, suprachoroidal;  
695 SR, subretinal; vg, viral genomes

696

697 **[Supplementary Figure 1]** Flow cytometry gating strategy for plasma B-cell quantification.

698

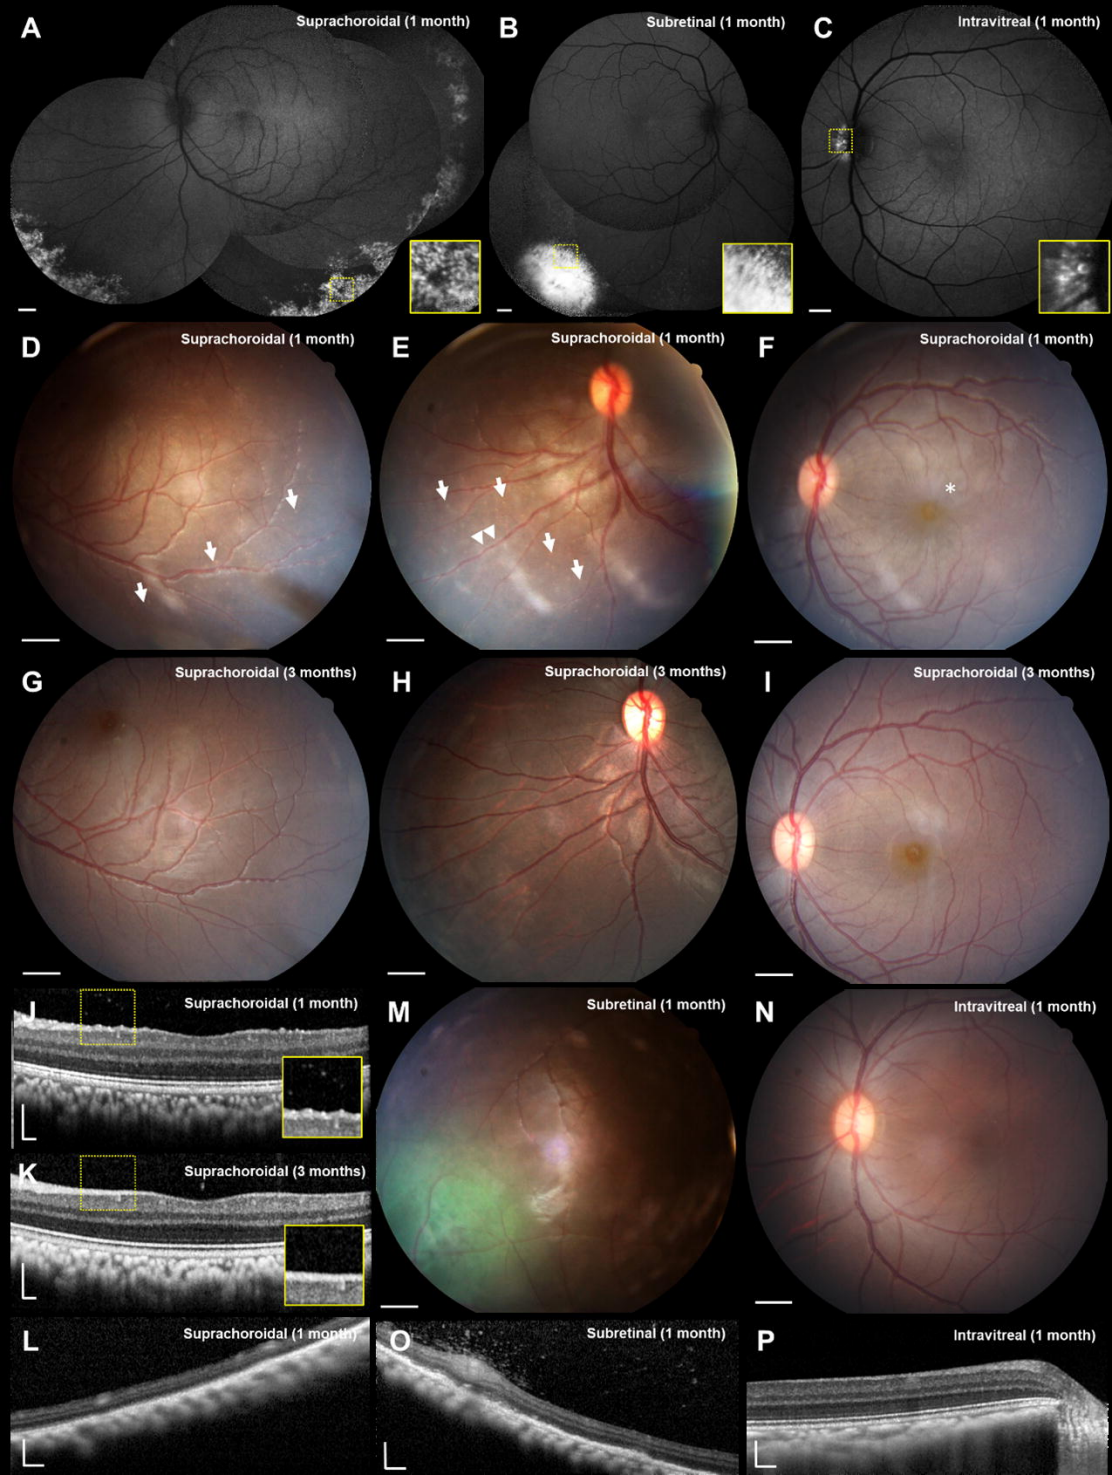

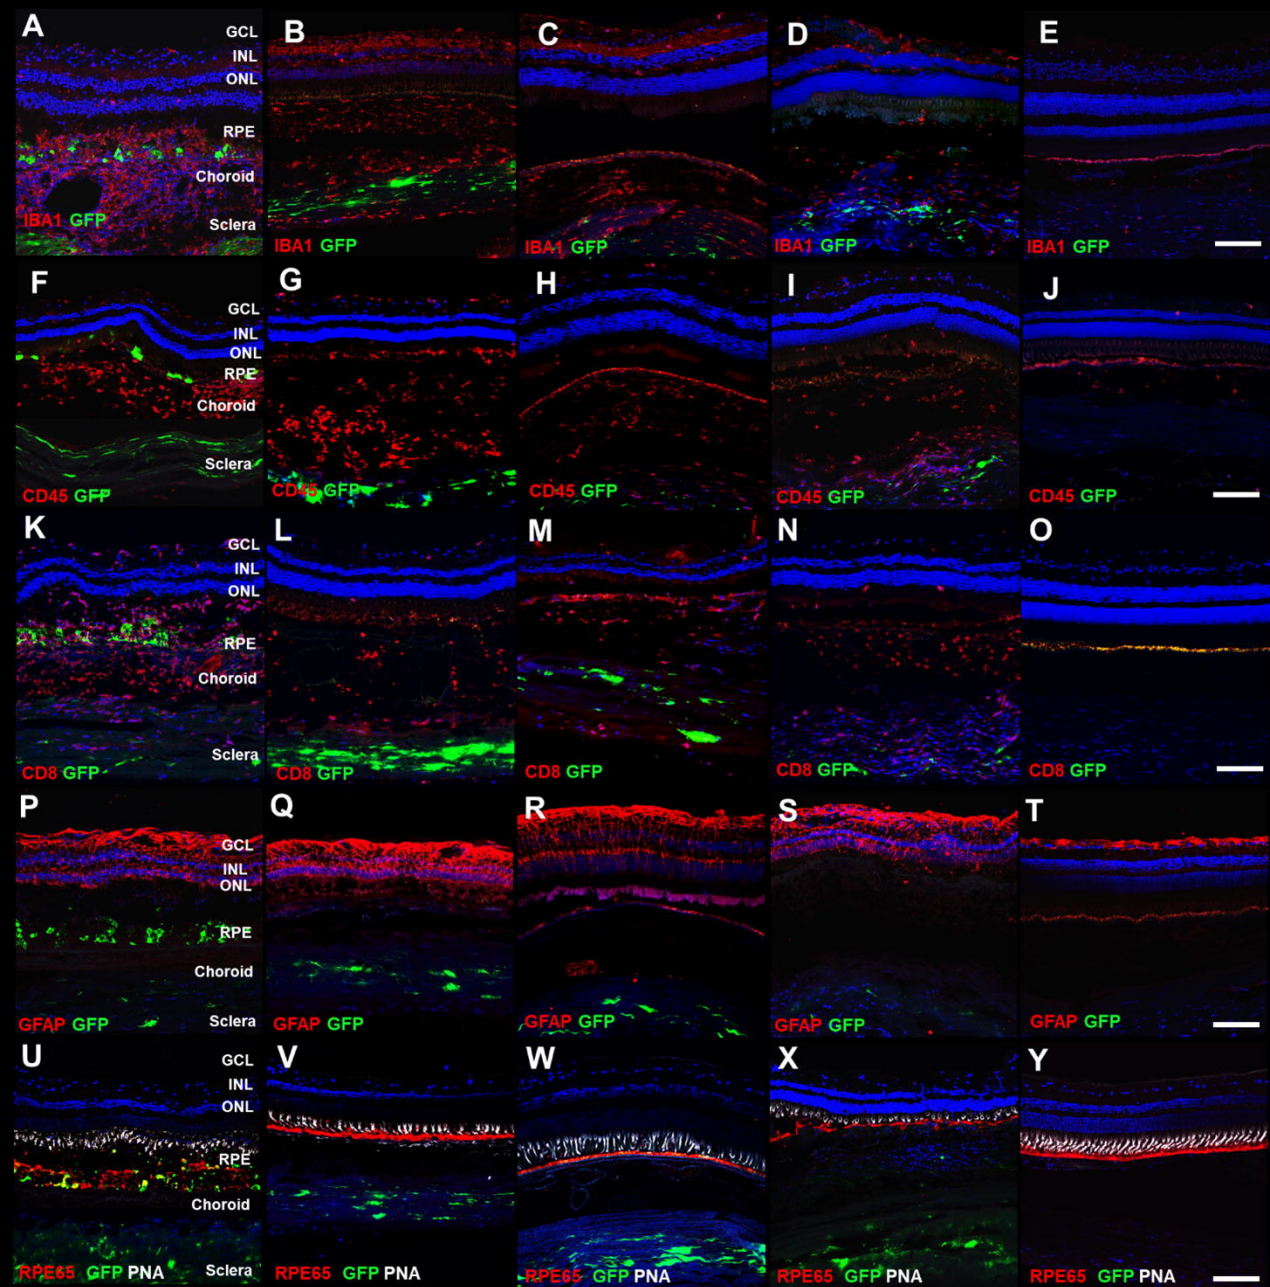



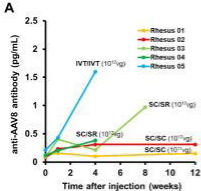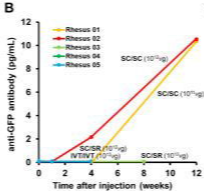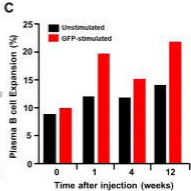

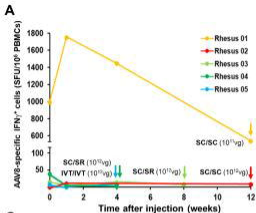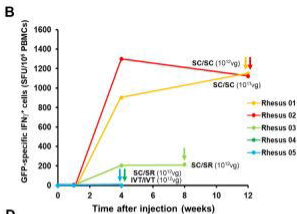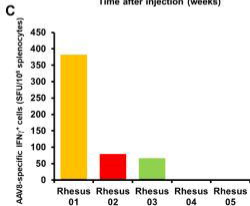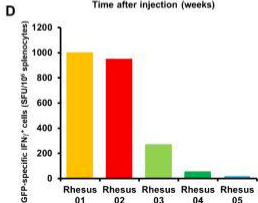

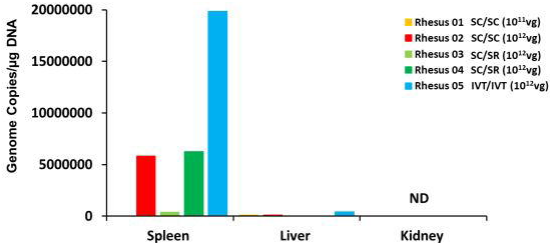

Source: http://biorxiv.org/content/10.1101/2020.09.25.313676v1.full.pdf
